# Supplementary material for: A CCG expansion in ABCD3 causes oculopharyngodistal myopathy in individuals of European ancestry
Source: PubMed Central journal article supplement (PMC11283466; doi:10.1038/s41467-024-49950-2), 2024-07-27
Supplement: 41467_2024_49950_MOESM3_ESM.pdf [file 41467_2024_49950_MOESM3_ESM.pdf]

## **Description of Additional Supplementary Files**

**File Name:** Supplementary Movie 1

**Description:** Key finding of neurological examination of subject UK1-II:1
